# Supplementary figures and images for: Effects of Transthoracic Echocardiography on the Prognosis of Patients with Acute Respiratory Distress Syndrome: a Propensity Score Matched Analysis of the MIMIC-III Database
Source: Research Square preprint supplement (doi:10.21203/rs.3.rs-1169012/v1), 2021-12-17

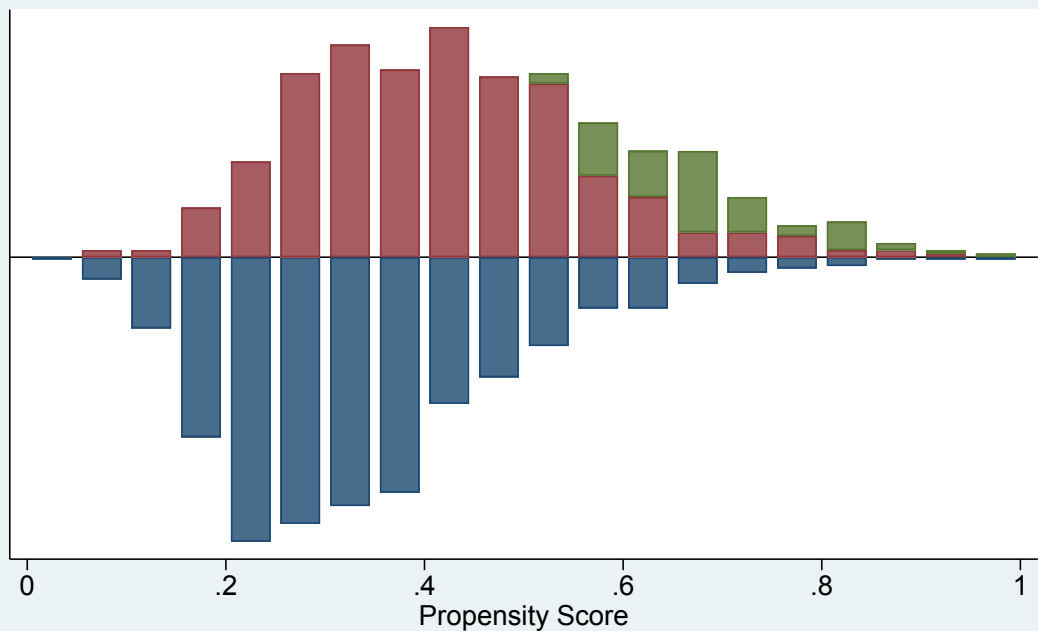

Untreated

Treated: On support

Treated: Off support

Supplement: Supplementary file 1 [file 471da059ff40d777e4a63e2d.pdf]

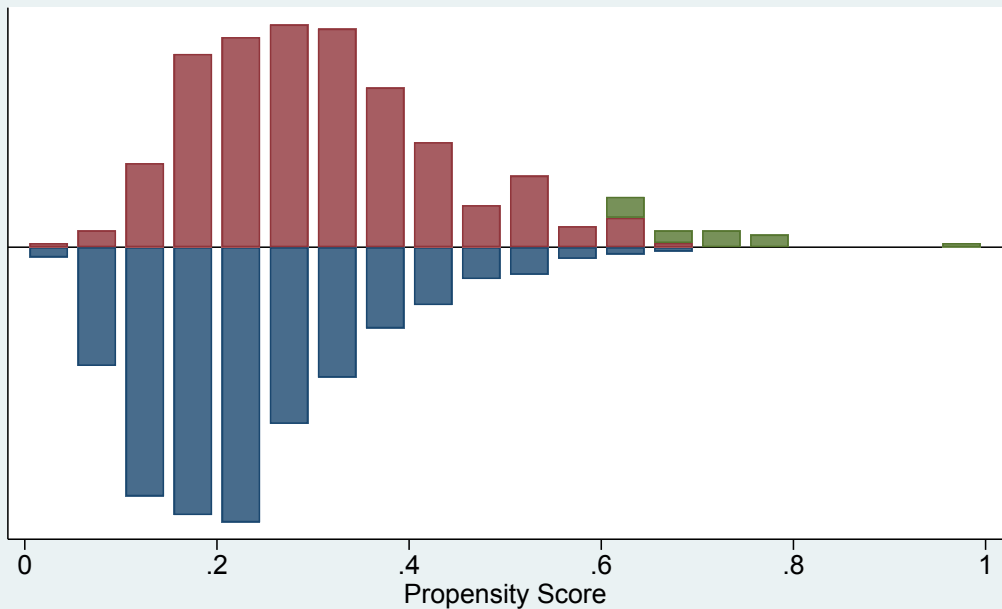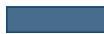

Untreated

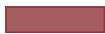

Treated: On support

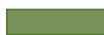

Treated: Off support

Supplement: Supplementary file 2 [file 5cbe1bce85b87bc574e29861.pdf]
